# Supplementary material
Source: Royal Society of Chemistry journal article supplement (doi:10.1039/d5cp04211a)

Figure S1

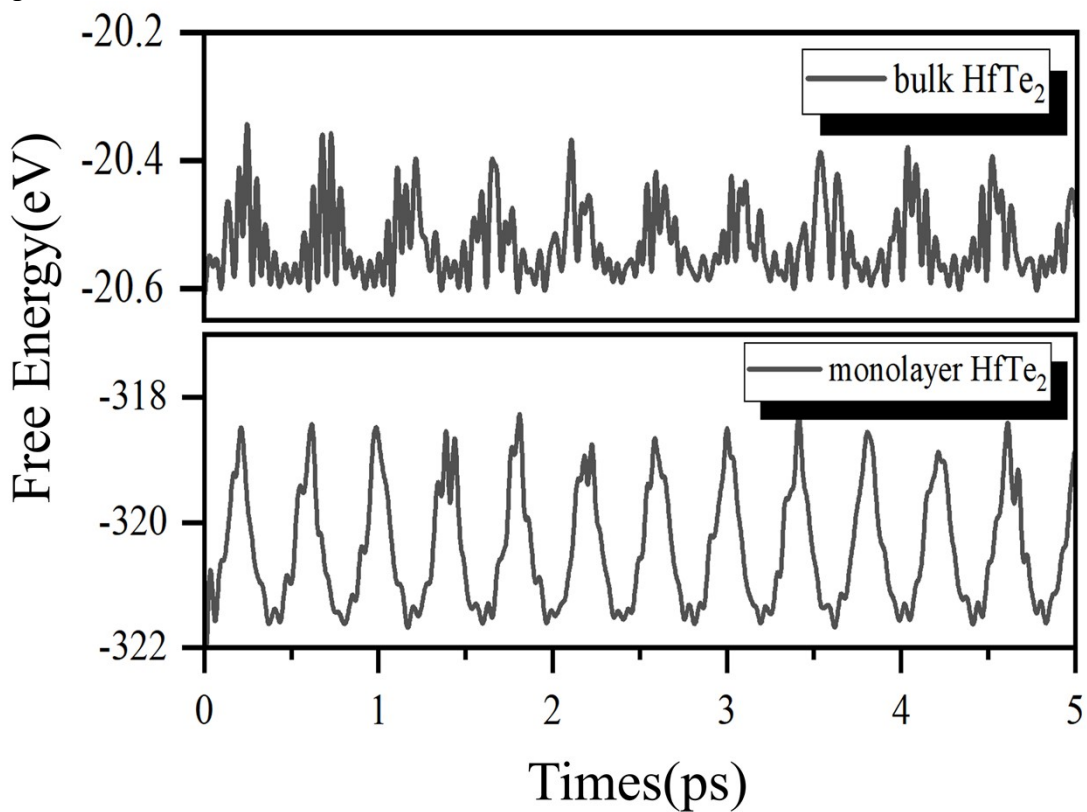

Figure S2

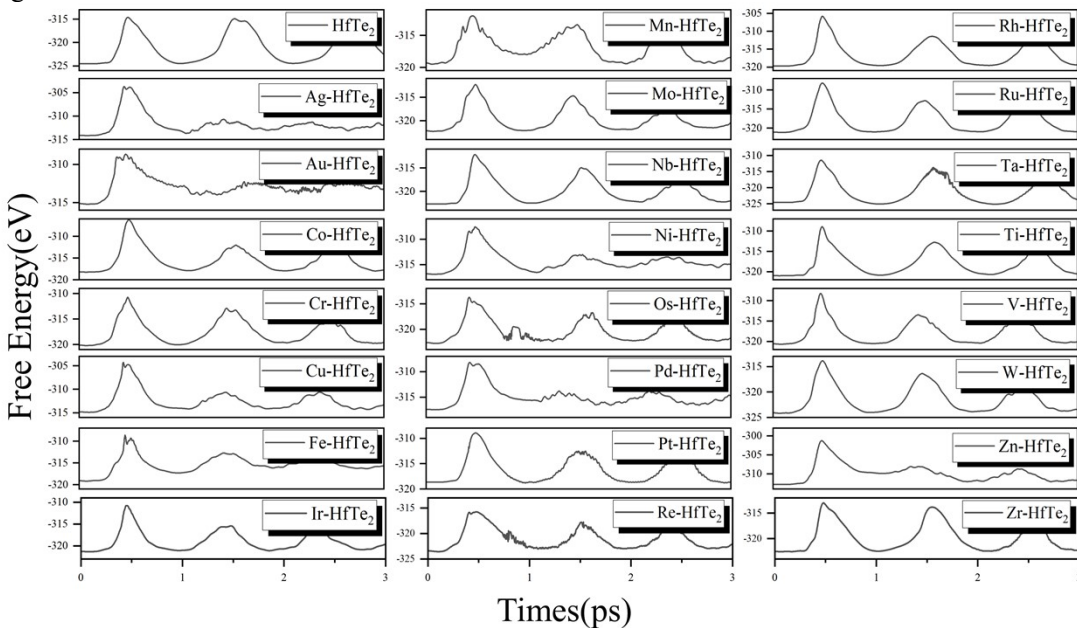

Figure S3

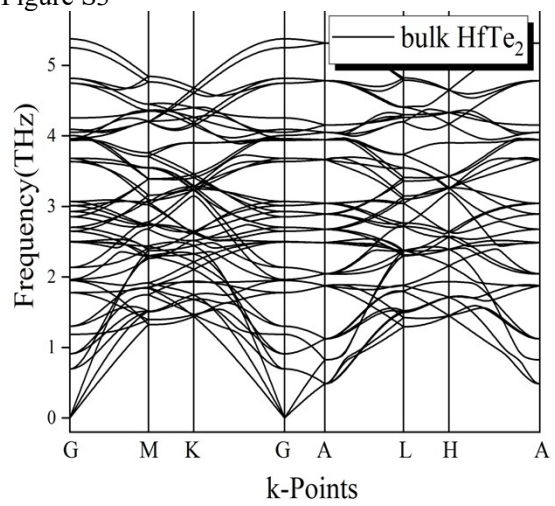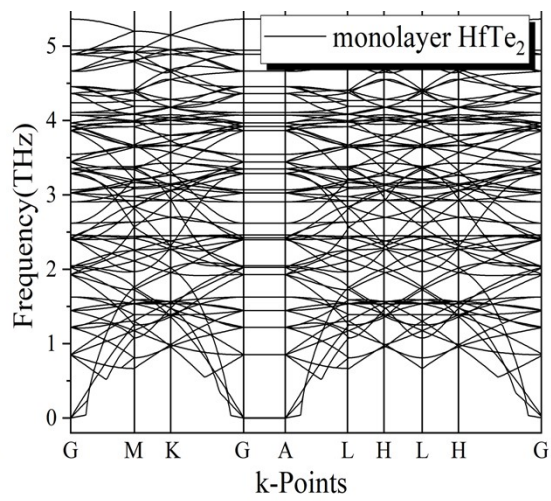

Figure S4

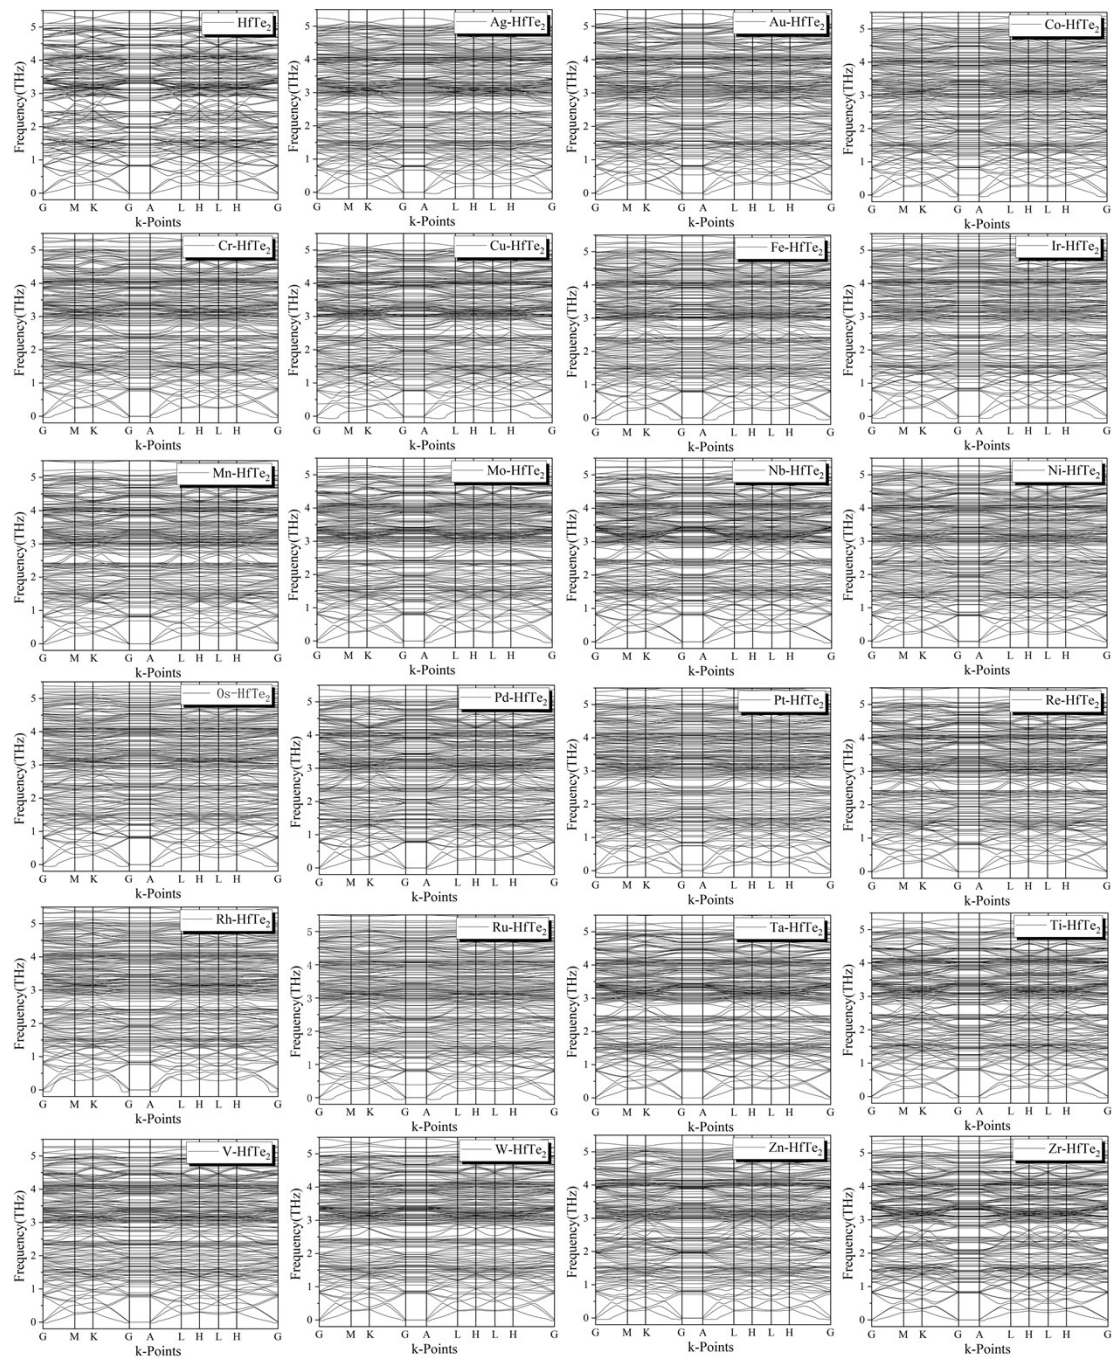

Figure S5

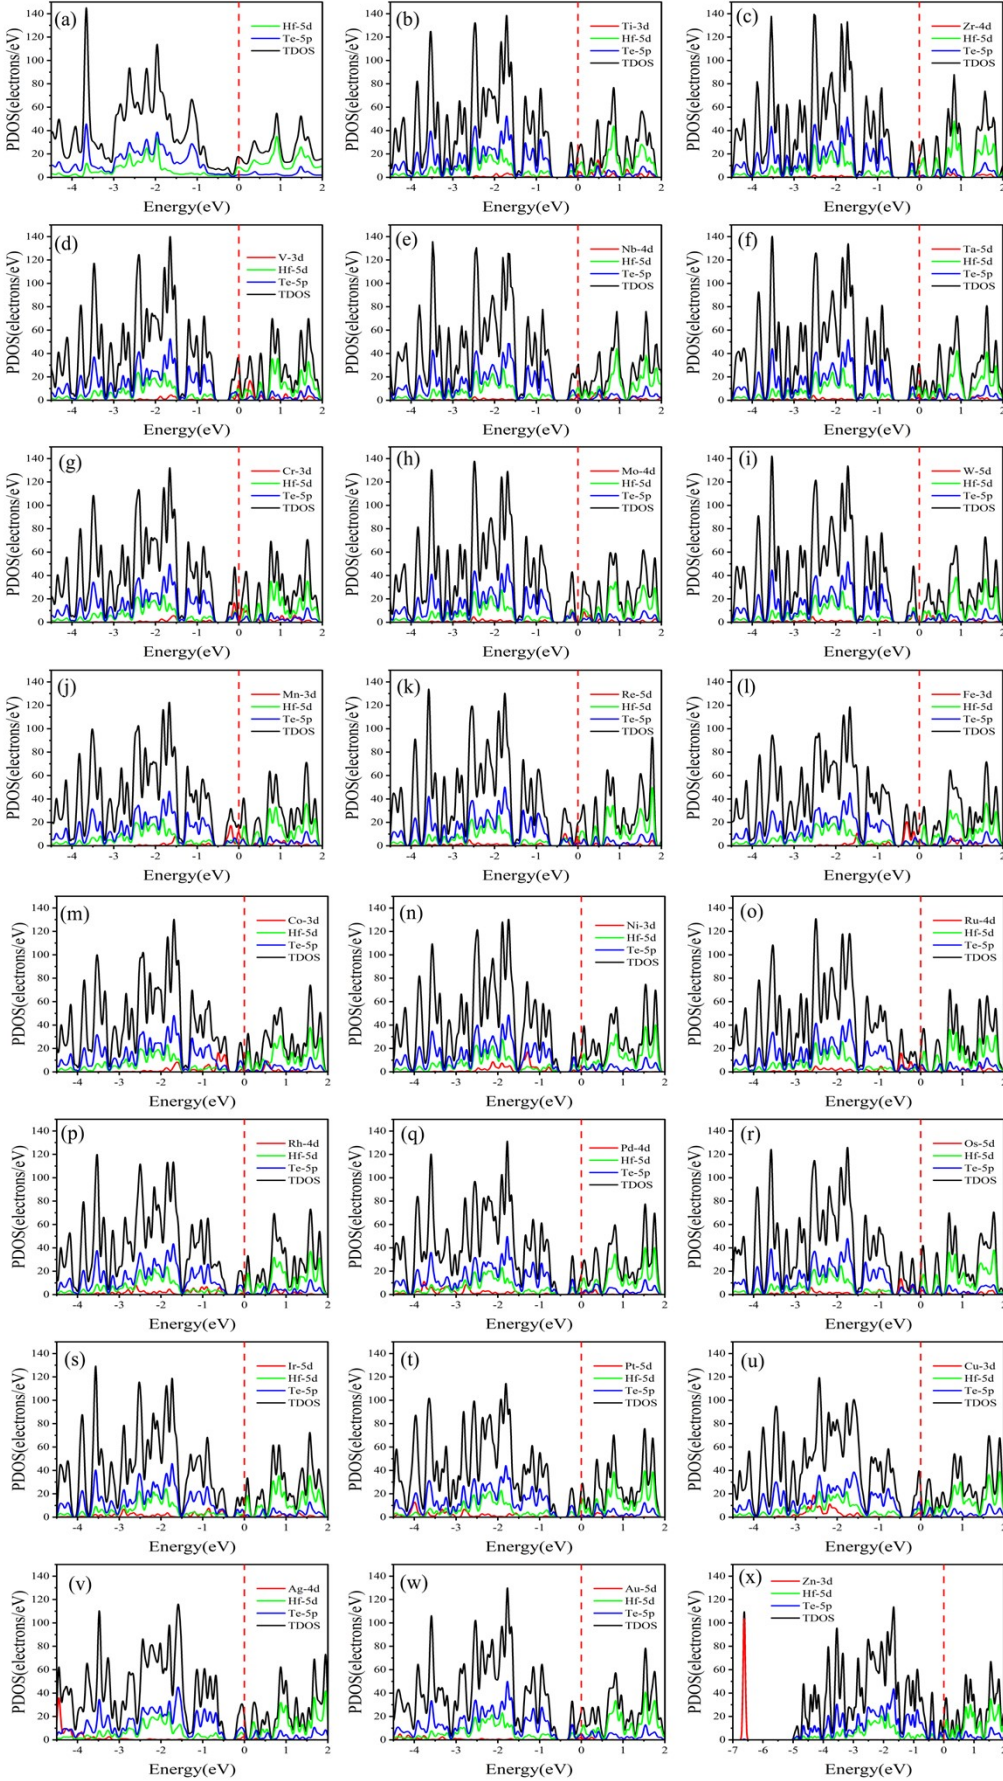

Figure S6

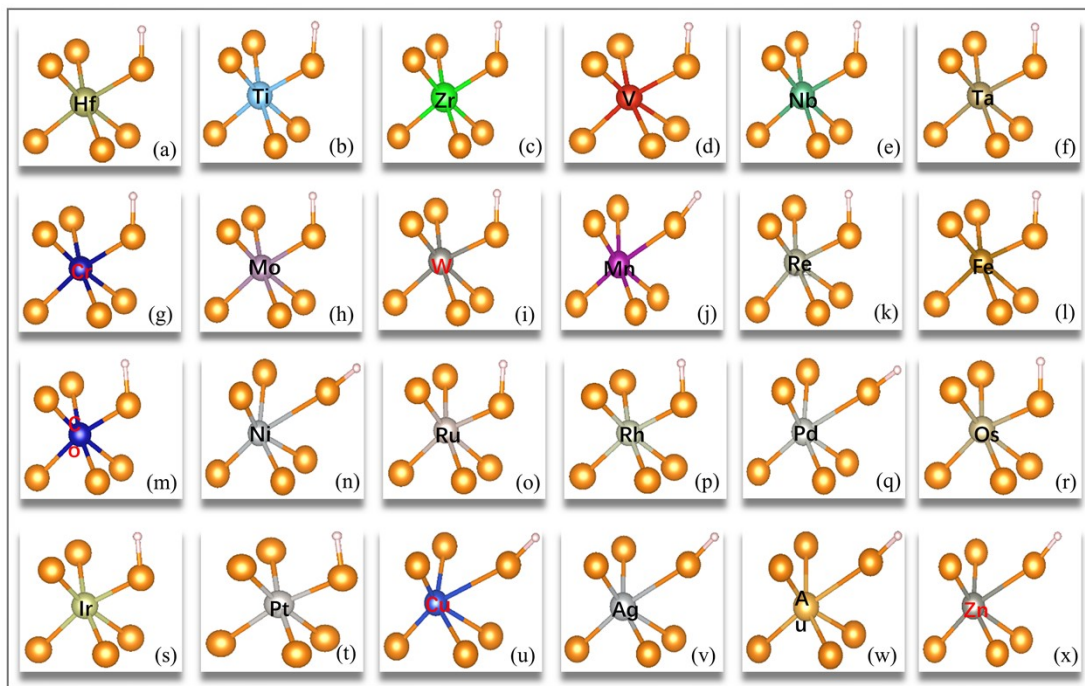

Figure S7

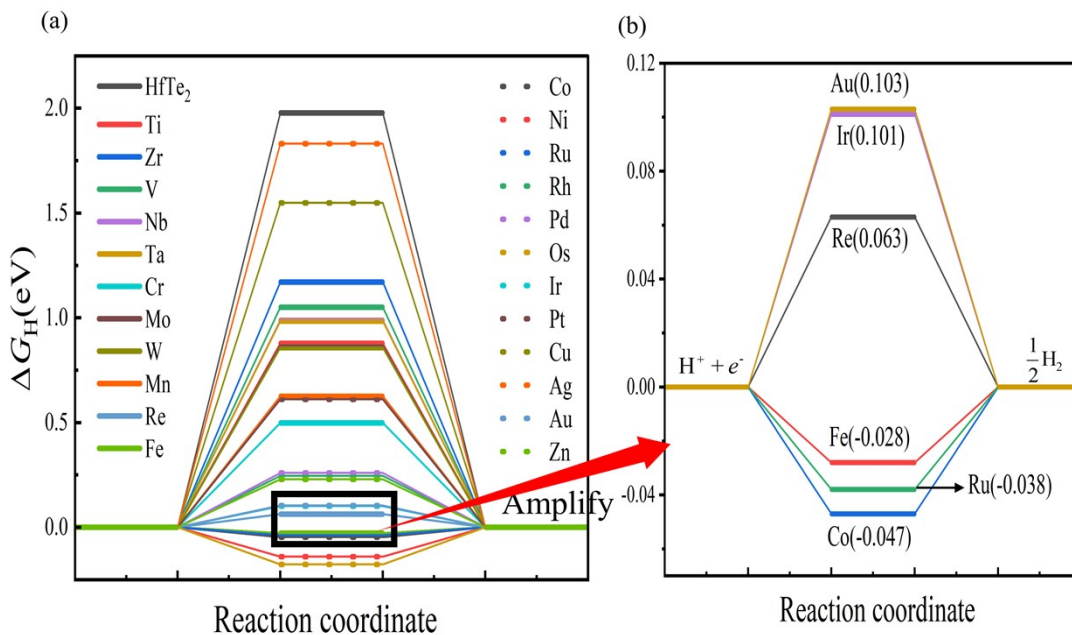

Supplement: d5cp04211a1.pdf [file d5cp04211a1.pdf]
